# Supplementary material for: Promoting ethylene production over a wide potential window on Cu crystallites induced and stabilized via current shock and charge delocalization
Source: PubMed Central journal article supplement (PMC8613262; doi:10.1038/s41467-021-27169-9), 2021-11-24
Supplement: 41467_2021_27169_MOESM1_ESM.pdf [file 41467_2021_27169_MOESM1_ESM.pdf]

# Supplementary Information

## Promoting Ethylene Production Over a Wide Potential Window on Cu Crystallites Induced and Stabilized via Current shock and Charge delocalization

Hao Sun<sup>1,2,5</sup>, Ling Chen<sup>3,5</sup>, Likun Xiong<sup>1,2</sup>, Kun Feng<sup>4</sup>, Yufeng Chen<sup>4</sup>, Xiang Zhang<sup>1,2</sup>, Xuzhou Yuan<sup>1,2</sup>, Baiyu Yang<sup>1,2</sup>, Zhao Deng<sup>1,2</sup>, Yu Liu<sup>1,2</sup>, Mark H. Rummeli<sup>1,2</sup>, Jun Zhong<sup>4\*</sup>, Yan Jiao<sup>3\*</sup>, and Yang Peng<sup>1,2\*</sup>

<sup>1</sup>Soochow Institute for Energy and Materials Innovations, College of Energy, Soochow University, Suzhou 215006, P. R. China. <sup>2</sup>Key Laboratory of Advanced Carbon Materials and Wearable Energy Technologies of Jiangsu Province, Suzhou, P. R. China. <sup>3</sup>School of Chemical Engineering and Advanced Materials, The University of Adelaide, Adelaide SA 5005, Australia, <sup>4</sup>Institute of Functional Nano & Soft Materials (FUNSOM), Jiangsu Key Laboratory for Carbon-Based Functional Materials & Devices, Soochow University, Suzhou 215123, China. <sup>5</sup>These authors contributed equally: Hao Sun, Ling Chen. Correspondence and requests for materials should be addressed to J.Z. (email: [jzhong@suda.edu.cn](mailto:jzhong@suda.edu.cn)) or to Y.J. ([yan.jiao@adelaide.edu.au](mailto:yan.jiao@adelaide.edu.au)) or to Y.P. (email: [ypeng@suda.edu.cn](mailto:ypeng@suda.edu.cn))

### Methods

#### Faradaic Efficiency of Gas Products.

$$FE_a = \frac{v \times C_a}{A \times V_m} \times Z_a \times F}{j_{total}} \times 100\%$$

$FE_a$ : Faradaic Efficiency of the product a

$v$ : CO<sub>2</sub> gas flow rate (L s<sup>-1</sup>)

$C_a$ : Volumefraction of the product a detected by GC

$A$ : Geometric area of the electrode (cm<sup>2</sup>)

$V_m$ : molar Volume (22.4 L mol<sup>-1</sup>)

$Z_a$ : electrons transferred for reduction to product a

$F$ : Faradaic Constant (C mol<sup>-1</sup>)

$j_{total}$ : Total current density during CO<sub>2</sub> bulk electrolysis (A cm<sup>-2</sup>)

#### Partial current density.

$$j_a = FE_a \times j_{total}$$

Figures and Tables

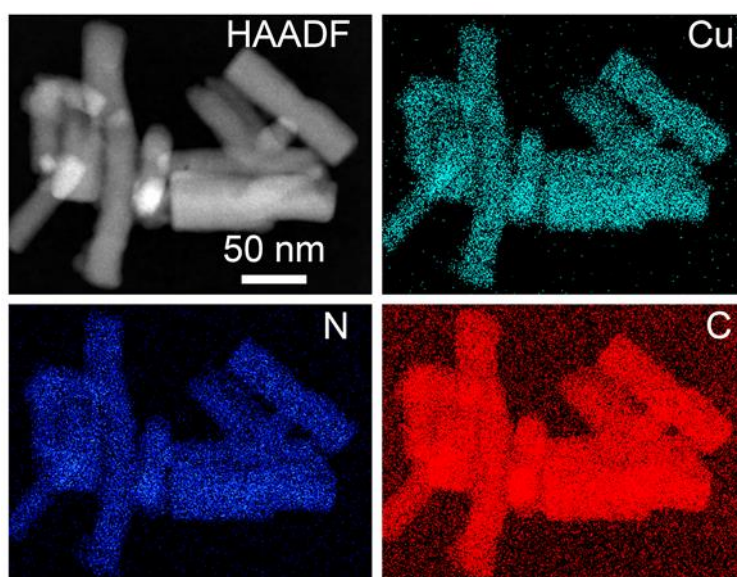

**Supplementary Fig. 1** EDX-mapping images of  $\text{Cu}_3(\text{HITP})_2$  showing the homogeneous distribution of Cu, N, and C.

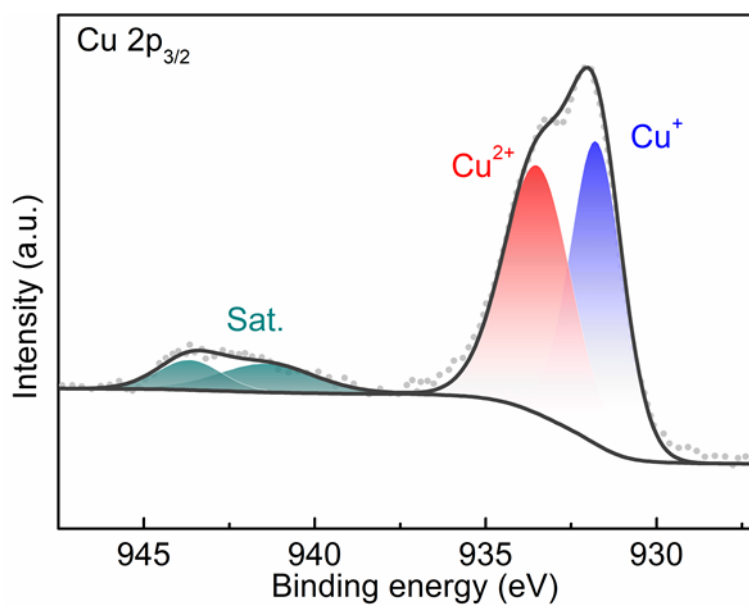

**Supplementary Fig. 2** XPS  $\text{Cu } 2p_{3/2}$  spectrum of  $\text{Cu}_3(\text{HITP})_2$ .

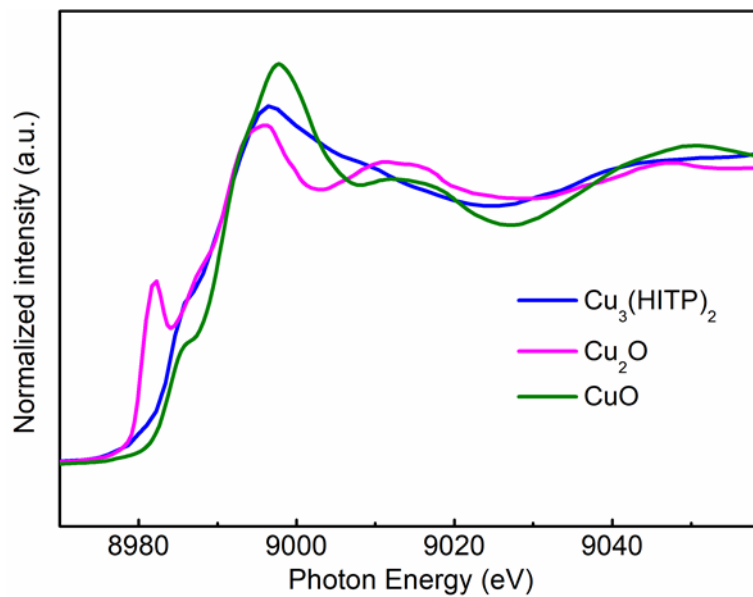

**Supplementary Fig. 3** Normalized Cu K-edge XANES spectra of  $\text{Cu}_3(\text{HITP})_2$  in reference to  $\text{CuO}$  and  $\text{Cu}_2\text{O}$ .

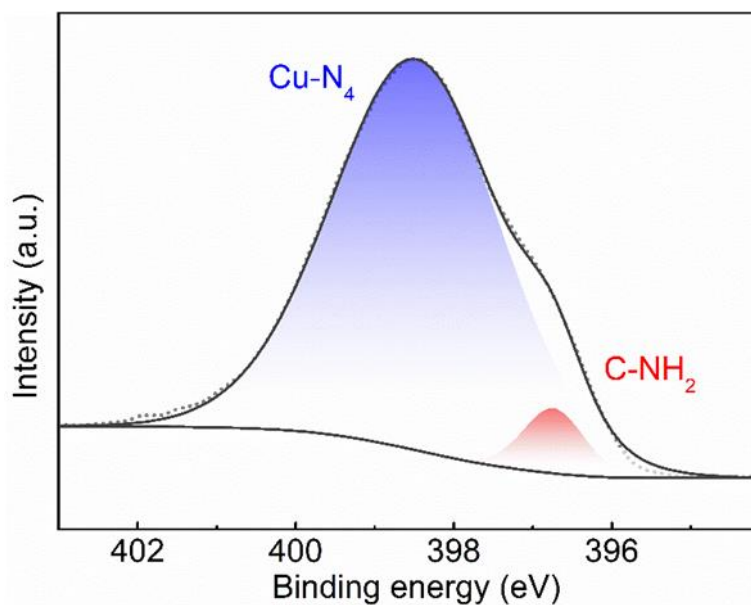

**Supplementary Fig. 4** XPS N 1s spectrum of  $\text{Cu}_3(\text{HITP})_2$ .

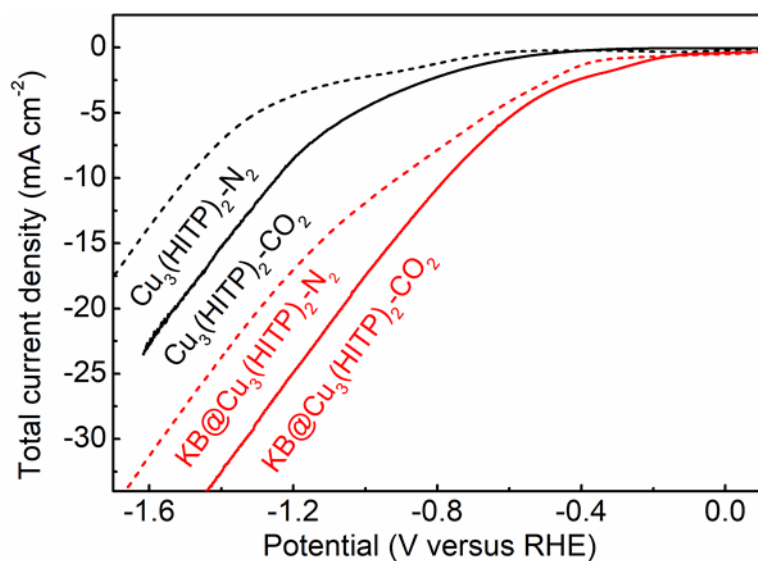

**Supplementary Fig. 5** LSV curves of  $\text{KB@Cu}_3(\text{HITP})_2$  and  $\text{Cu}_3(\text{HITP})_2$  in  $\text{N}_2/\text{CO}_2$ -saturated 0.1 M  $\text{KHCO}_3$  solution.

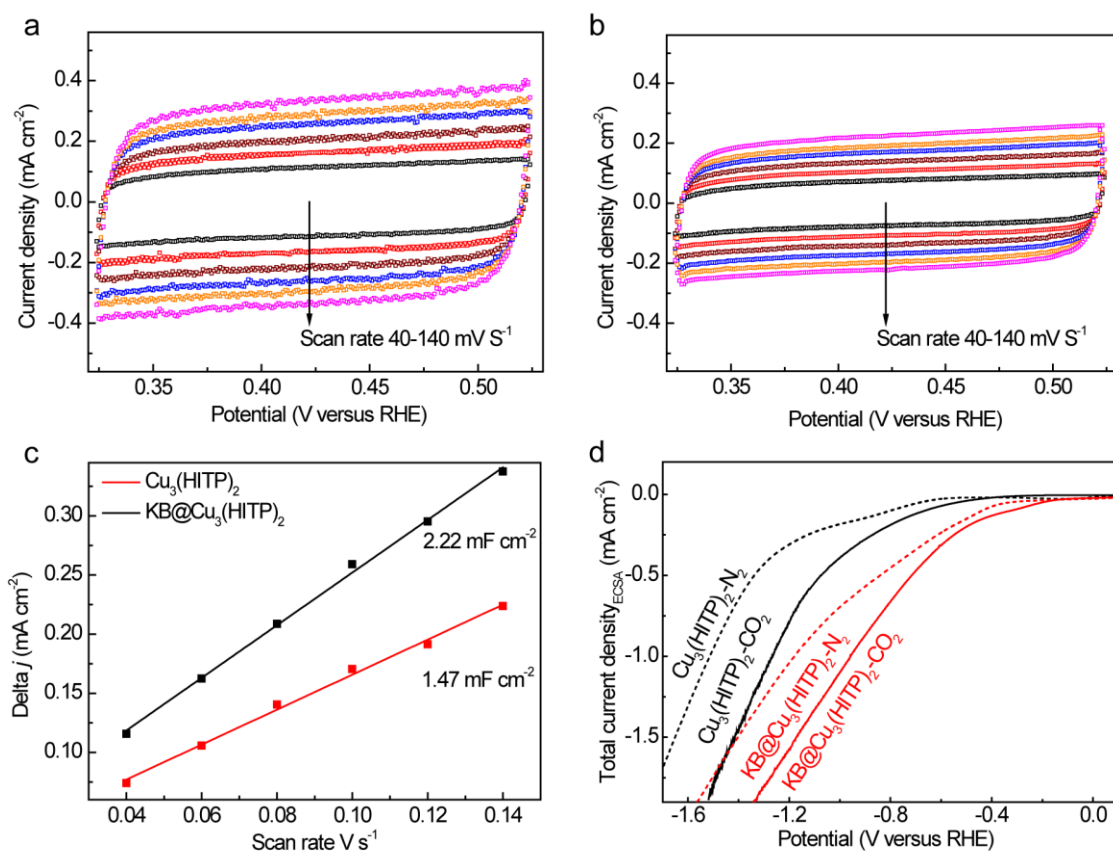

**Supplementary Fig. 6** CV curves of (a)  $\text{KB@Cu}_3(\text{HITP})_2$  and (b)  $\text{Cu}_3(\text{HITP})_2$  under different scan rates from 40 to 140  $\text{mV s}^{-1}$  in 0.1 M  $\text{KHCO}_3$ . (c) The plot of capacitive current at 0.42 V against the scan rate. (d) The LSV curves normalized to ECSA for  $\text{KB@Cu}_3(\text{HITP})_2$  and  $\text{Cu}_3(\text{HITP})_2$ .

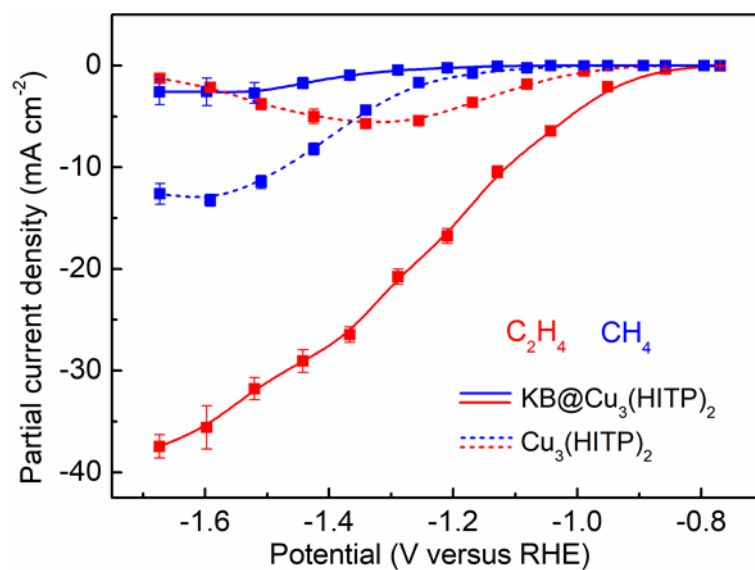

**Supplementary Fig. 7** Partial current densities of  $C_2H_4$  and  $CH_4$  production on  $KB@Cu_3(HITP)_2$  and  $Cu_3(HITP)_2$ .

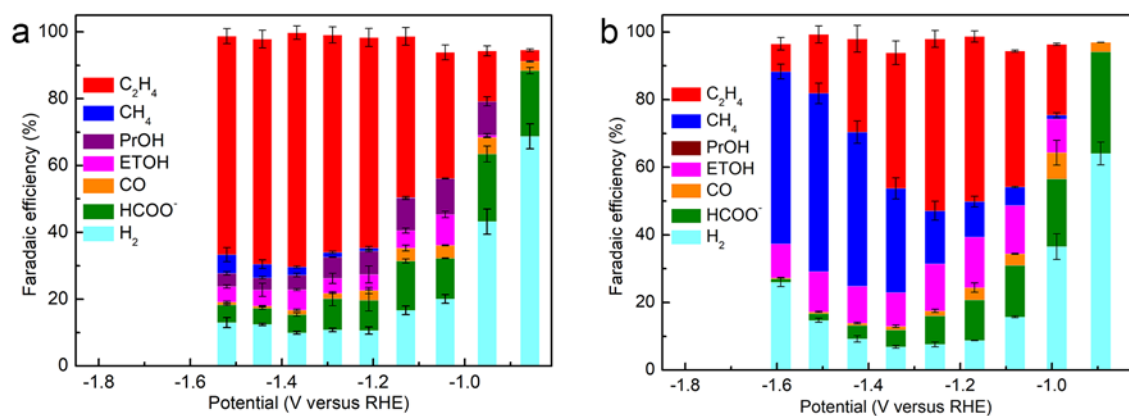

**Supplementary Fig. 8** FEs of all  $CO_2$  reduction products for (a)  $KB@Cu_3(HITP)_2$  and (b)  $Cu_3(HITP)_2$ .

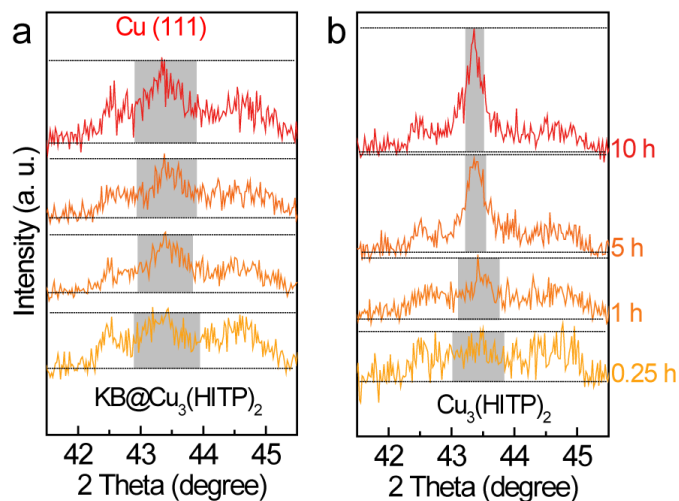

**Supplementary Fig. 9** Zoom-in diffractograms for XRD Cu(111) peaks of (a) KB@Cu<sub>3</sub>(HITP)<sub>2</sub> and (b) Cu<sub>3</sub>(HITP)<sub>2</sub>.

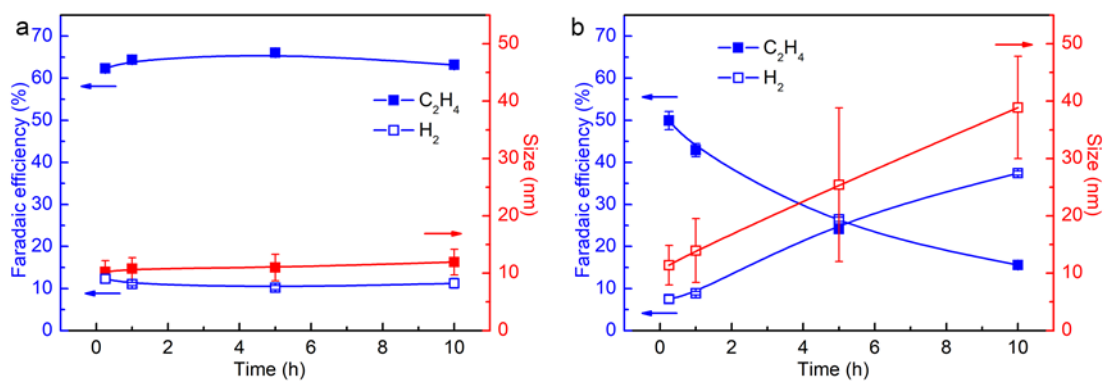

**Supplementary Fig. 10** Correlation between the Cu particle size observed in TEM and the FEs of C<sub>2</sub>H<sub>4</sub> and H<sub>2</sub> for (a) KB@Cu<sub>3</sub>(HITP)<sub>2</sub> and (b) Cu<sub>3</sub>(HITP)<sub>2</sub> in chronoamperometric tests.

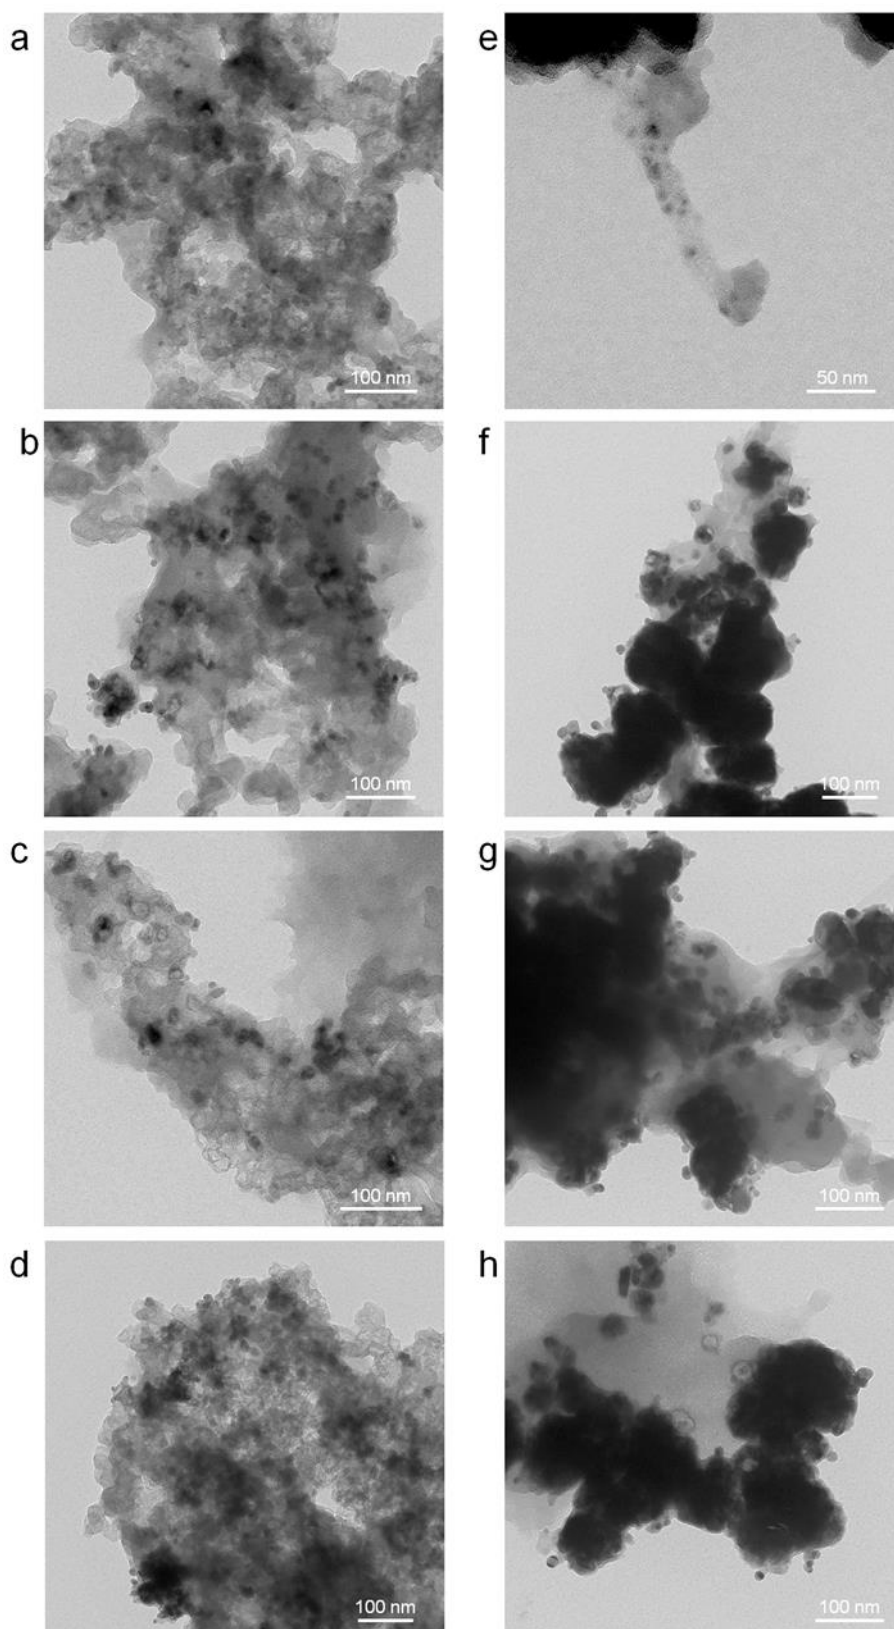

**Supplementary Fig. 11** TEM images of KB@Cu<sub>3</sub>(HITP)<sub>2</sub> after 0.25 h CO<sub>2</sub>RR at (a)-1.21 V, (b)-1.37 V, (c)-1.52 V and (d)-1.67 V. TEM images of Cu<sub>3</sub>(HITP)<sub>2</sub> after 0.25 h CO<sub>2</sub>RR at (e)-1.25 V, (f)-1.42 V, (g)-1.59 V and (h)-1.75 V.

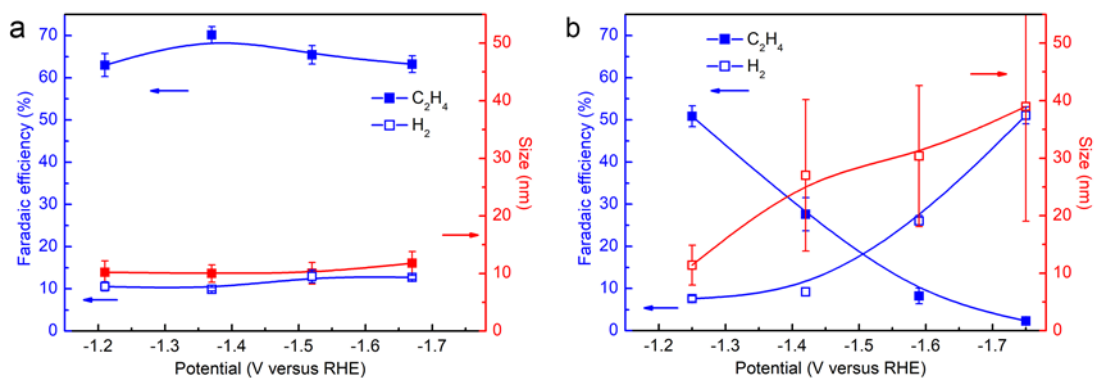

**Supplementary Fig. 12** Correlation between the Cu particle size observed in TEM and the FEs of C<sub>2</sub>H<sub>4</sub> and H<sub>2</sub> for (a) KB@Cu<sub>3</sub>(HITP)<sub>2</sub> and (b) Cu<sub>3</sub>(HITP)<sub>2</sub> at varying potentials.

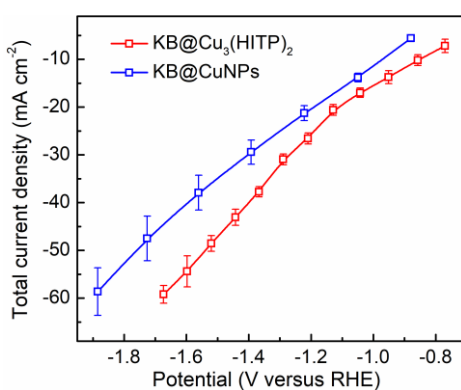

**Supplementary Fig. 13** Total current densities on KB@Cu<sub>3</sub>(HITP)<sub>2</sub> and KB@CuNPs.

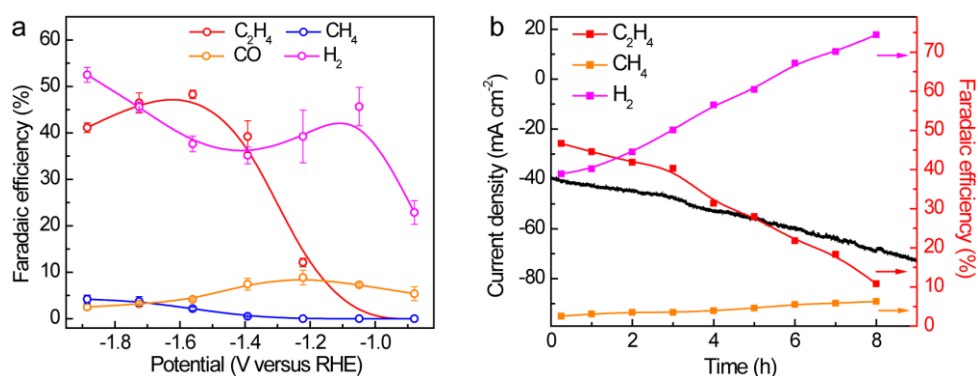

**Supplementary Fig. 14** (a) FEs of C<sub>2</sub>H<sub>4</sub>, CH<sub>4</sub>, CO, and H<sub>2</sub> at different potentials tested in a H-cell with 0.1 M KHCO<sub>3</sub> for KB@Cu<sub>3</sub>(HITP)<sub>2</sub> and KB@CuNPs. (b) The chronoamperometric i-t test at -1.56 V for KB@CuNPs showing the evolution of total current density and FEs of C<sub>2</sub>H<sub>4</sub>, CH<sub>4</sub>, and H<sub>2</sub>.



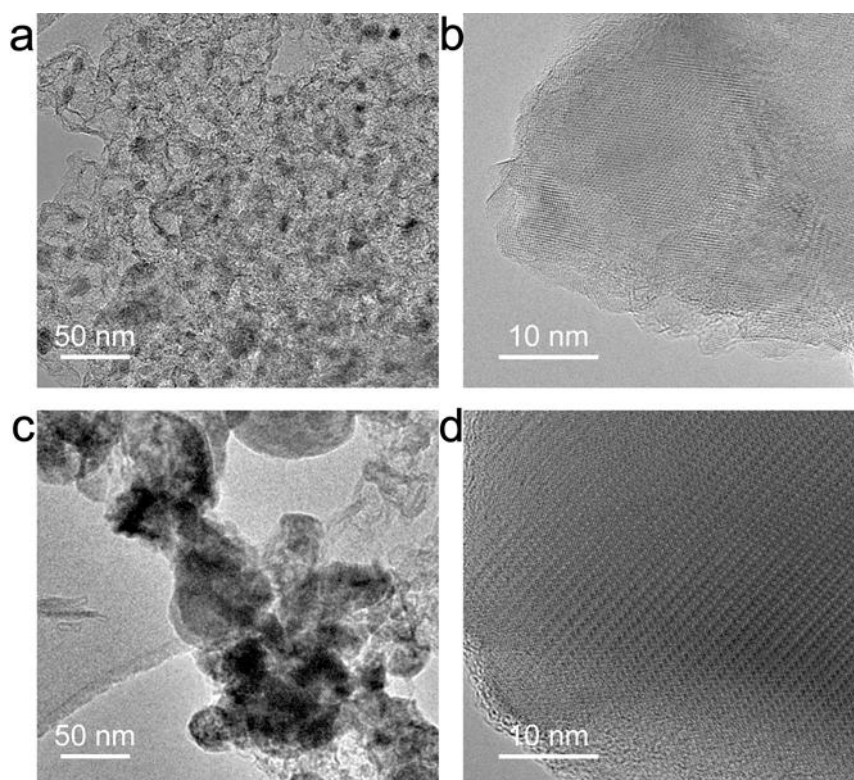

**Supplementary Fig. 15** TEM images taken on KB@CuNPs (a, b) before and (c, d) after a chronoamperometric testing period of 8 h at  $-1.56$  V.

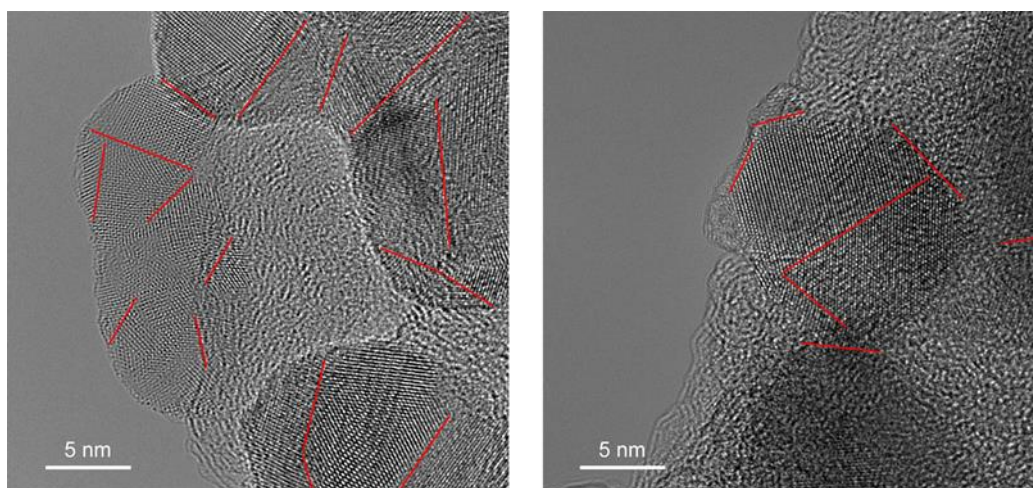

**Supplementary Fig. 16** TEM images of KB@Cu<sub>3</sub>(HITP)<sub>2</sub> after the CO<sub>2</sub>RR conducted at  $-1.25$  V for 10 h in CO<sub>2</sub>-saturated 0.1 M KHCO<sub>3</sub> electrolyte, the lines indicate the grain boundaries.

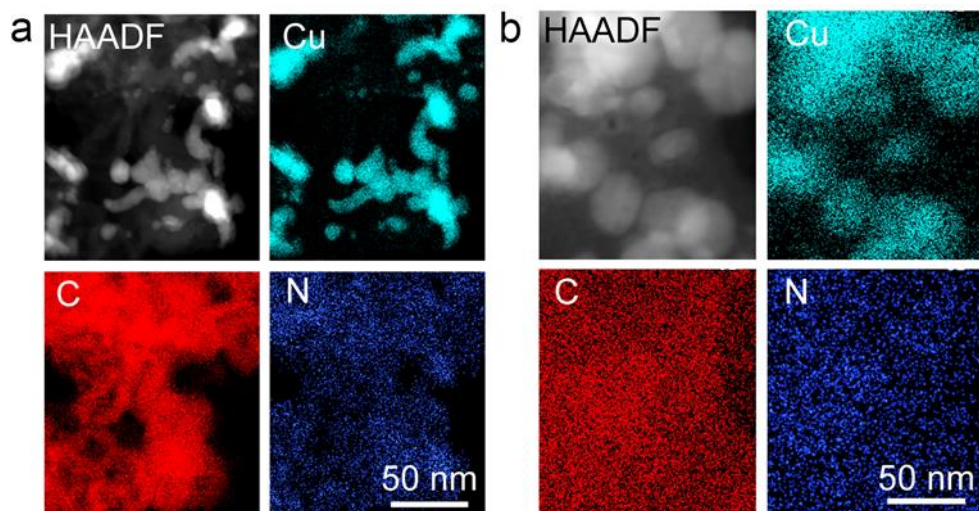

**Supplementary Fig. 17** STEM and EDX-Mapping images of (a) KB@Cu<sub>3</sub>(HITP)<sub>2</sub> and (b) Cu<sub>3</sub>(HITP)<sub>2</sub> after the CO<sub>2</sub>RR conducted at -1.25 V for 10 h in CO<sub>2</sub>-saturated 0.1 M KHCO<sub>3</sub> electrolyte.

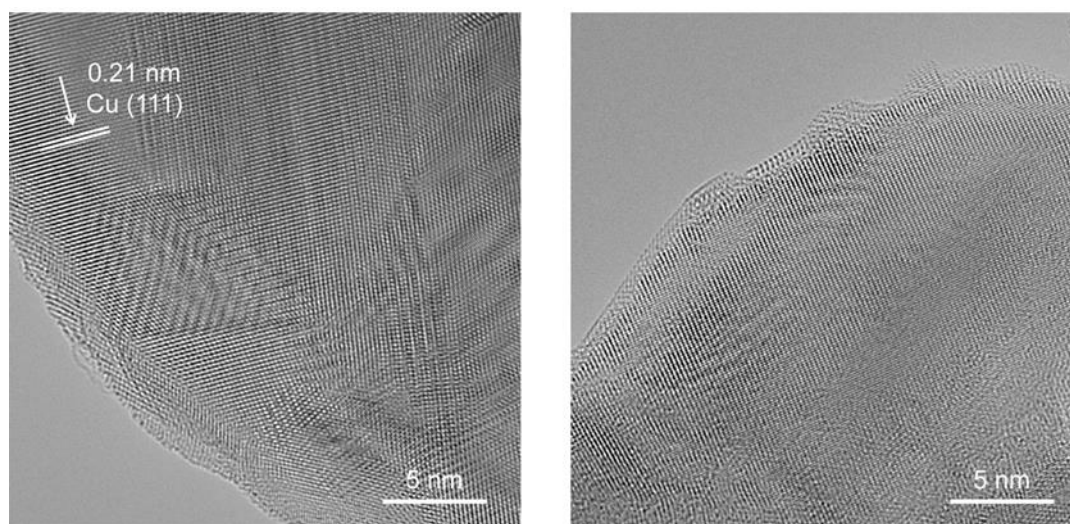

**Supplementary Fig. 18** TEM images of Cu<sub>3</sub>(HITP)<sub>2</sub> after the CO<sub>2</sub>RR conducted at -1.25 V for 10 h in CO<sub>2</sub>-saturated 0.1 M KHCO<sub>3</sub> electrolyte.

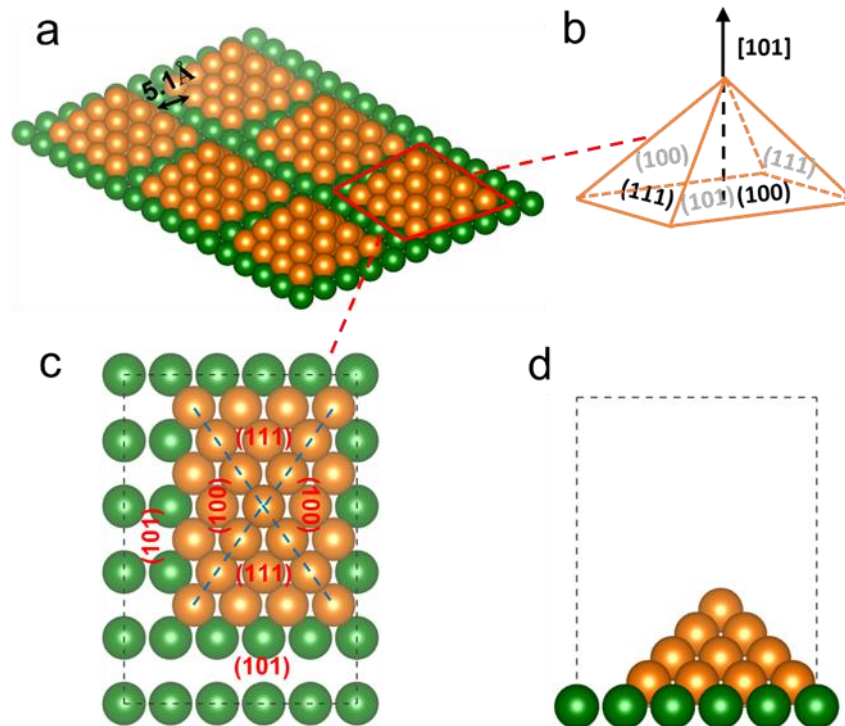

**Supplementary Fig. 19** (a) Atomic structures of [101] Cu rectangular nanopyramid to model post-electrolytic KB@Cu<sub>3</sub>(HITP)<sub>2</sub>. (b) Schematic illustration, (c) top view and (d) front view of single Cu rectangular nanopyramid sitting on 5×5×1 Cu(101) supercell. Colour codes: Cu, orange and green. The unit cell is marked with black slash lines and the grain boundaries are marked with blue slash lines as the visual guide.

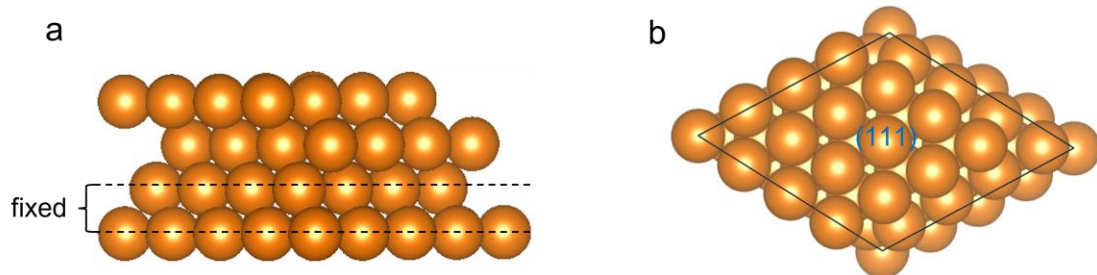

**Supplementary Fig. 20** (a) Front view and (b) top view of atomic structures of post-electrolytic Cu<sub>3</sub>(HITP)<sub>2</sub> based on 4×4×4 Cu(111) supercell. Colour codes: Cu, orange.

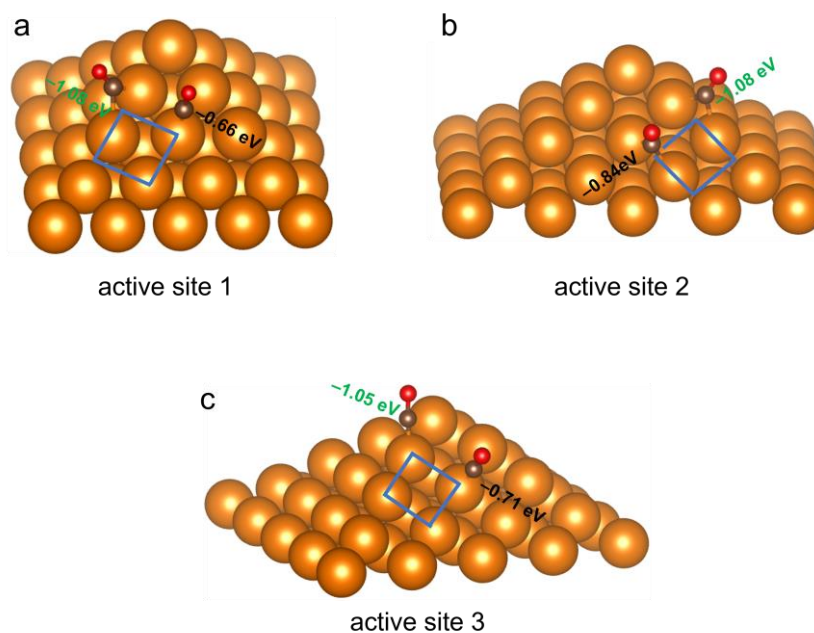

**Supplementary Fig. 21** Active sites identified on Cu-RNP surface and the application of ‘*extended square principle*’, i.e. C–C coupling prefers to proceed between strongly-bound  $\ast\text{CO}$  and weakly-bound  $\ast\text{CO}$  within under-coordinated (i.e. lattice boundary) surface square sites.  $E^\ast\text{CO}$  values are marked in green and black, denoting strong and weak adsorption, respectively.

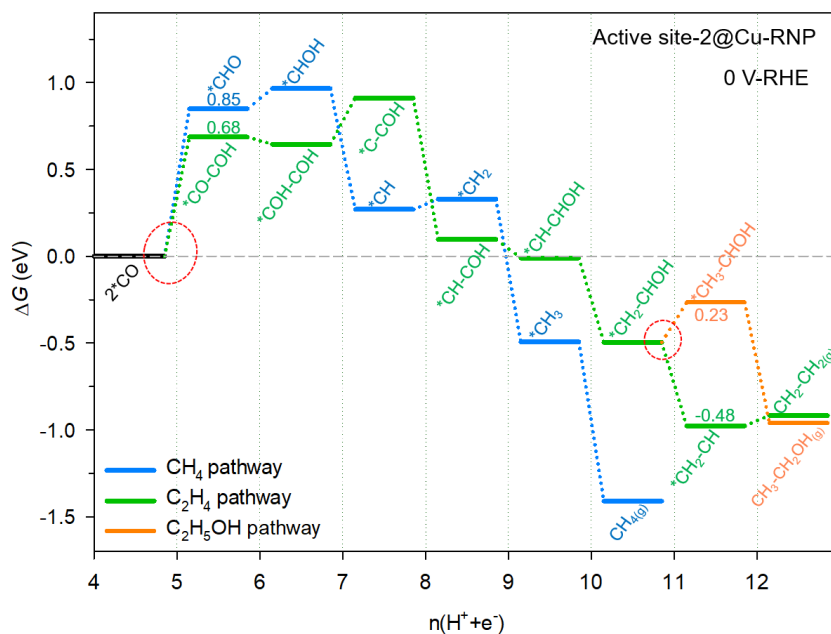

**Supplementary Fig. 22** Reaction pathways starting with  $2\ast\text{CO}$  on active site-2 of Cu [101] rectangular nanopyramids (Cu-RNP) at 0 V vs RHE. The key bifurcating points are highlighted with red circles and the unit of energy is eV.

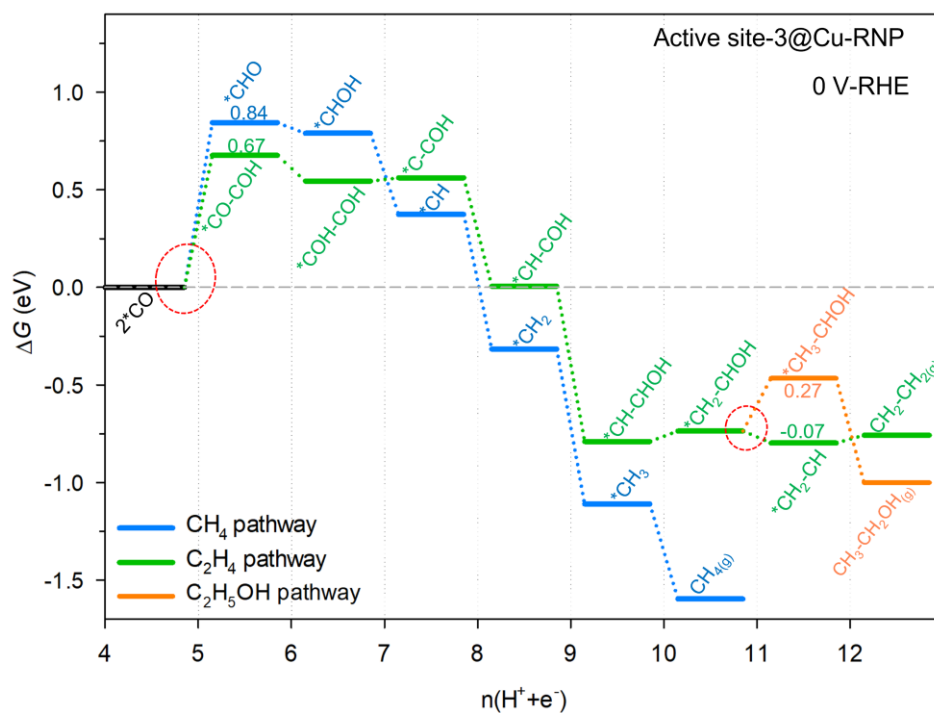

**Supplementary Fig. 23** Reaction pathways starting with  $2^*CO$  on active site-3 of Cu [101] rectangular nanopyramids (Cu-RNP) at 0 V vs RHE. The key bifurcating points are highlighted with red circles and the unit of energy is eV.

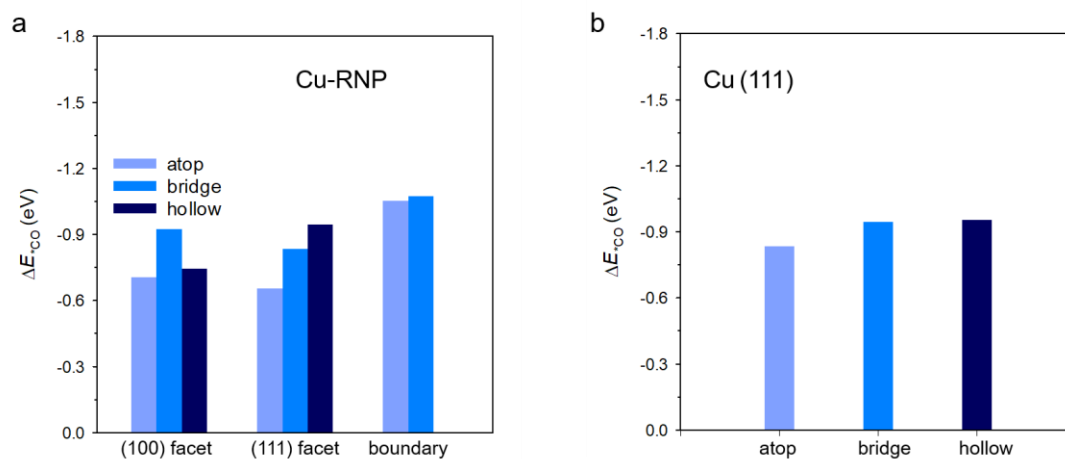

**Supplementary Fig. 24**  $^*CO$  binding energies on various adsorption sites of (a) Cu-RNP and (b) Cu(111).

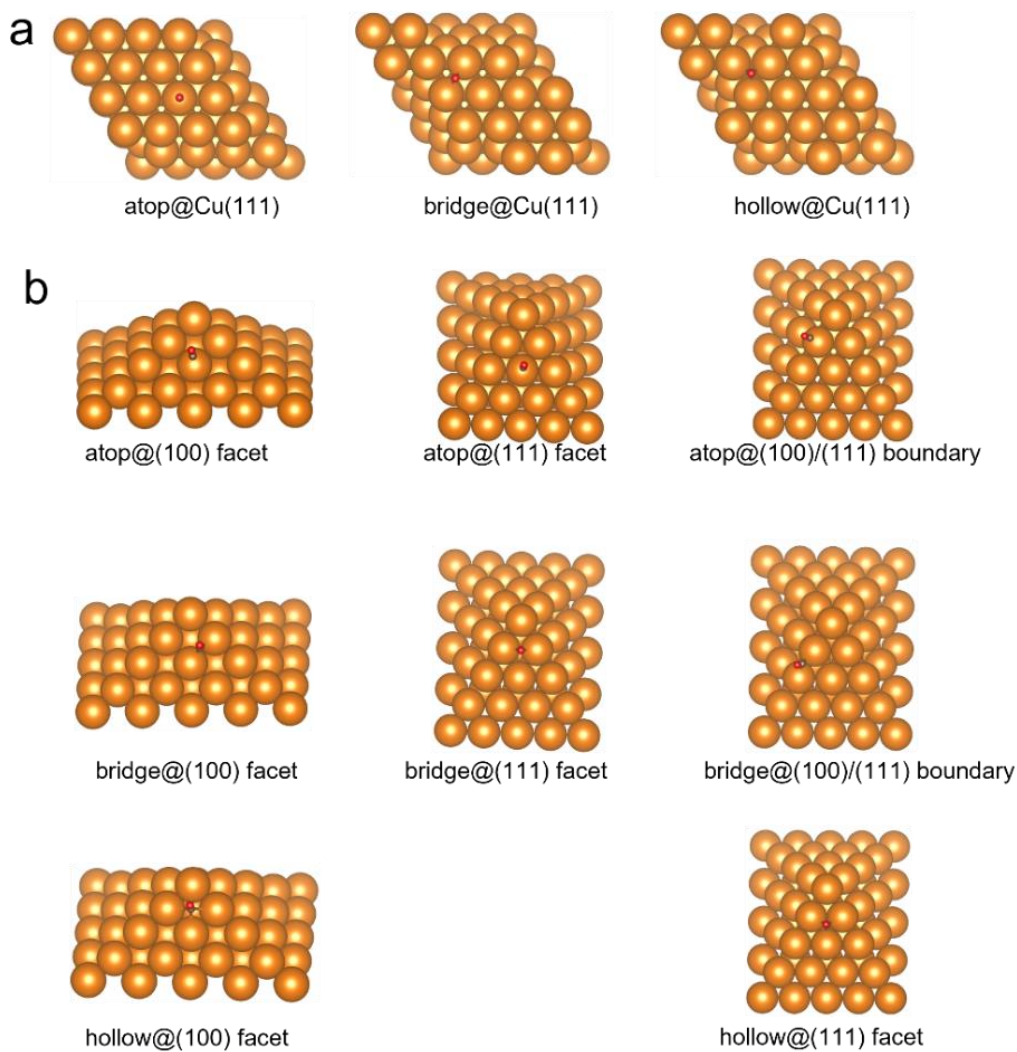

**Supplementary Fig. 25.** \*CO and \*H adsorption sites identified on (a) Cu (111) surface and (b) Cu-RNP surface. \*CO was used as the exemplified atomic configuration.

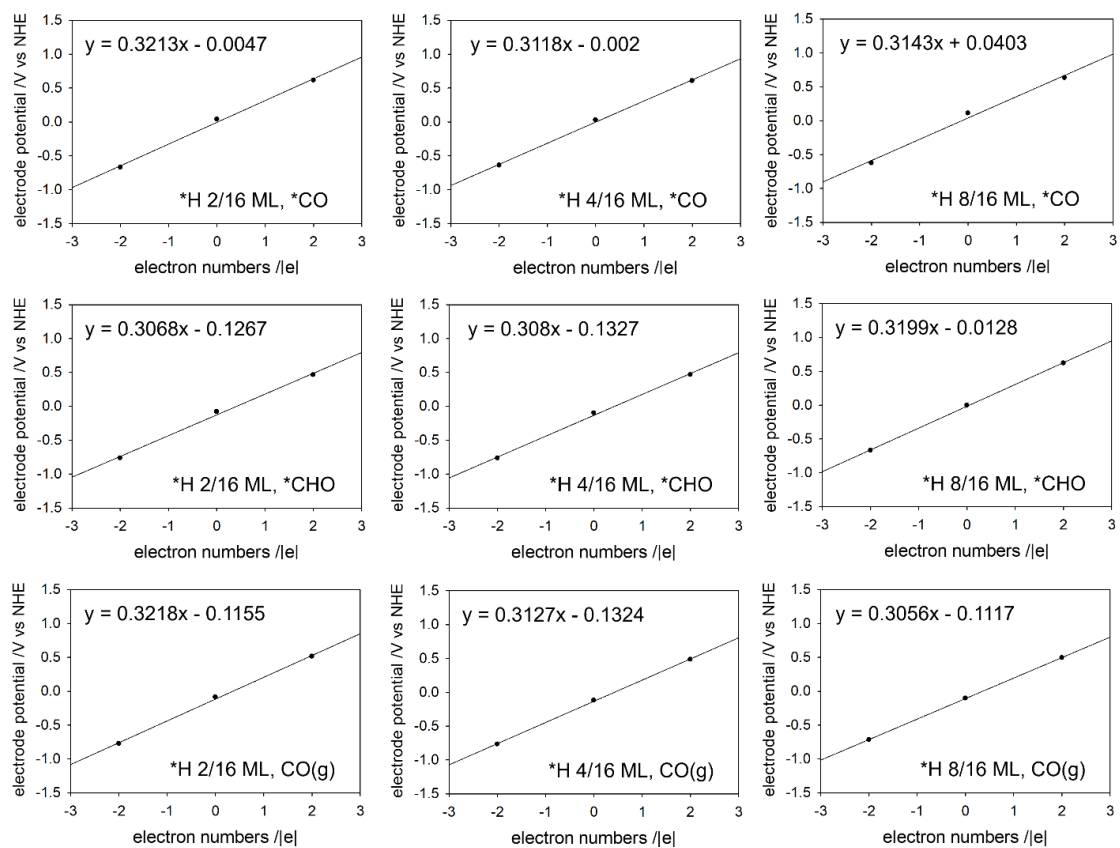

**Supplementary Fig. 26.** Calculated electrode potentials as the function of surface electron numbers for the intermediates \*CO, \*CHO and CO<sub>(g)</sub> on Cu(111) under various \*H coverage.

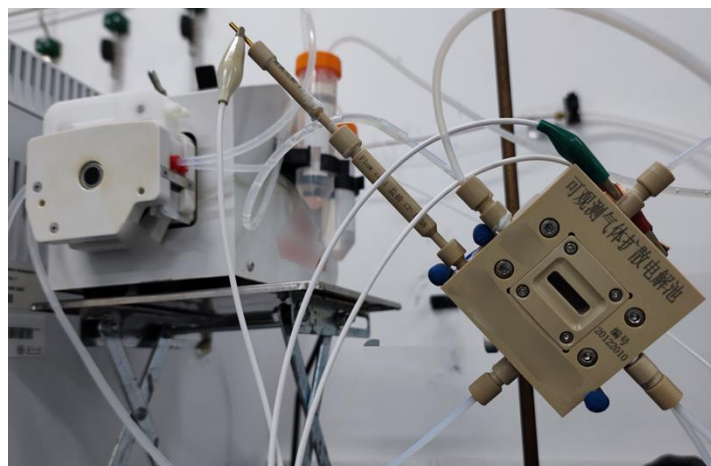

**Supplementary Fig. 27** Photograph of the flow cell used for electrocatalytic CO<sub>2</sub>RR.

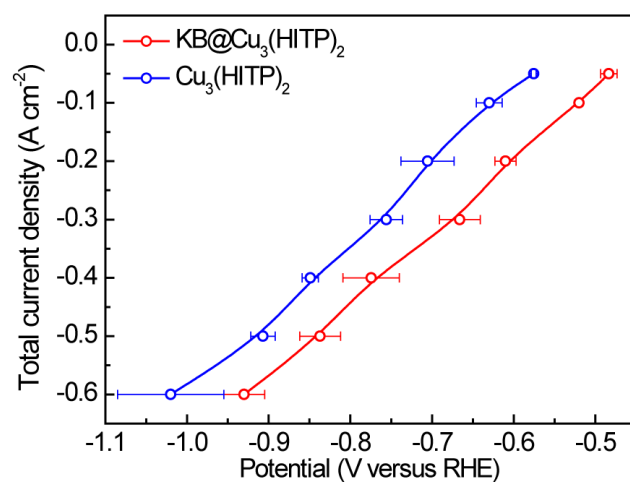

**Supplementary Fig. 28** Total current densities on KB@Cu<sub>3</sub>(HITP)<sub>2</sub> and Cu<sub>3</sub>(HITP)<sub>2</sub>.

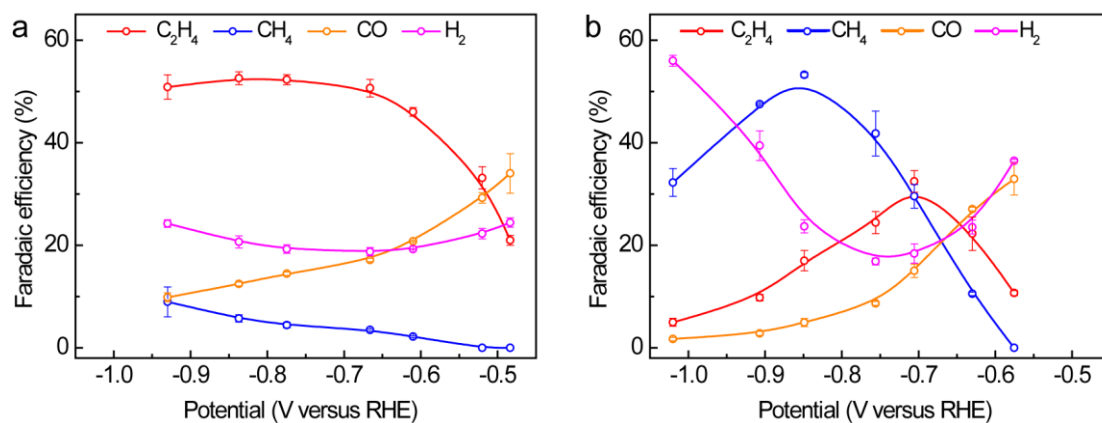

**Supplementary Fig. 29** FEs of C<sub>2</sub>H<sub>4</sub>, CH<sub>4</sub>, CO, and H<sub>2</sub> at different potentials tested in a flow-cell with 1 M KOH electrolyte for (a) KB@Cu<sub>3</sub>(HITP)<sub>2</sub> and (b) Cu<sub>3</sub>(HITP)<sub>2</sub>.

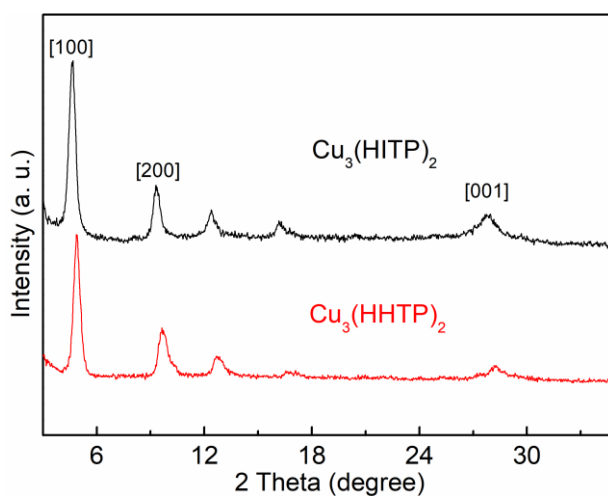

**Supplementary Fig. 30** XRD patterns of Cu<sub>3</sub>(HITP)<sub>2</sub> and Cu<sub>3</sub>(HHTP)<sub>2</sub>.



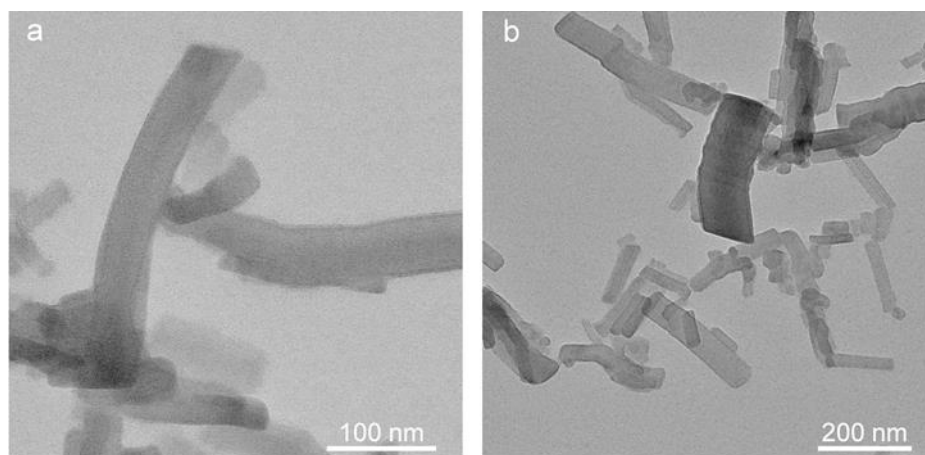

**Supplementary Fig. 31** TEM images of  $\text{Cu}_3(\text{HHTP})_2$ .

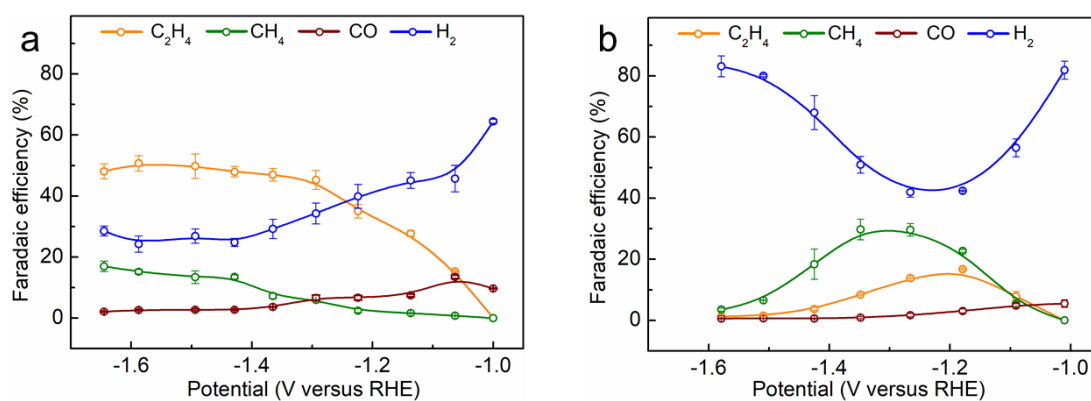

**Supplementary Fig. 32** Faradaic efficiencies of  $\text{CO}_2$  reduction products for (a)  $\text{KB@Cu}_3(\text{HHTP})_2$  and (b)  $\text{Cu}_3(\text{HHTP})_2$  at various potentials.

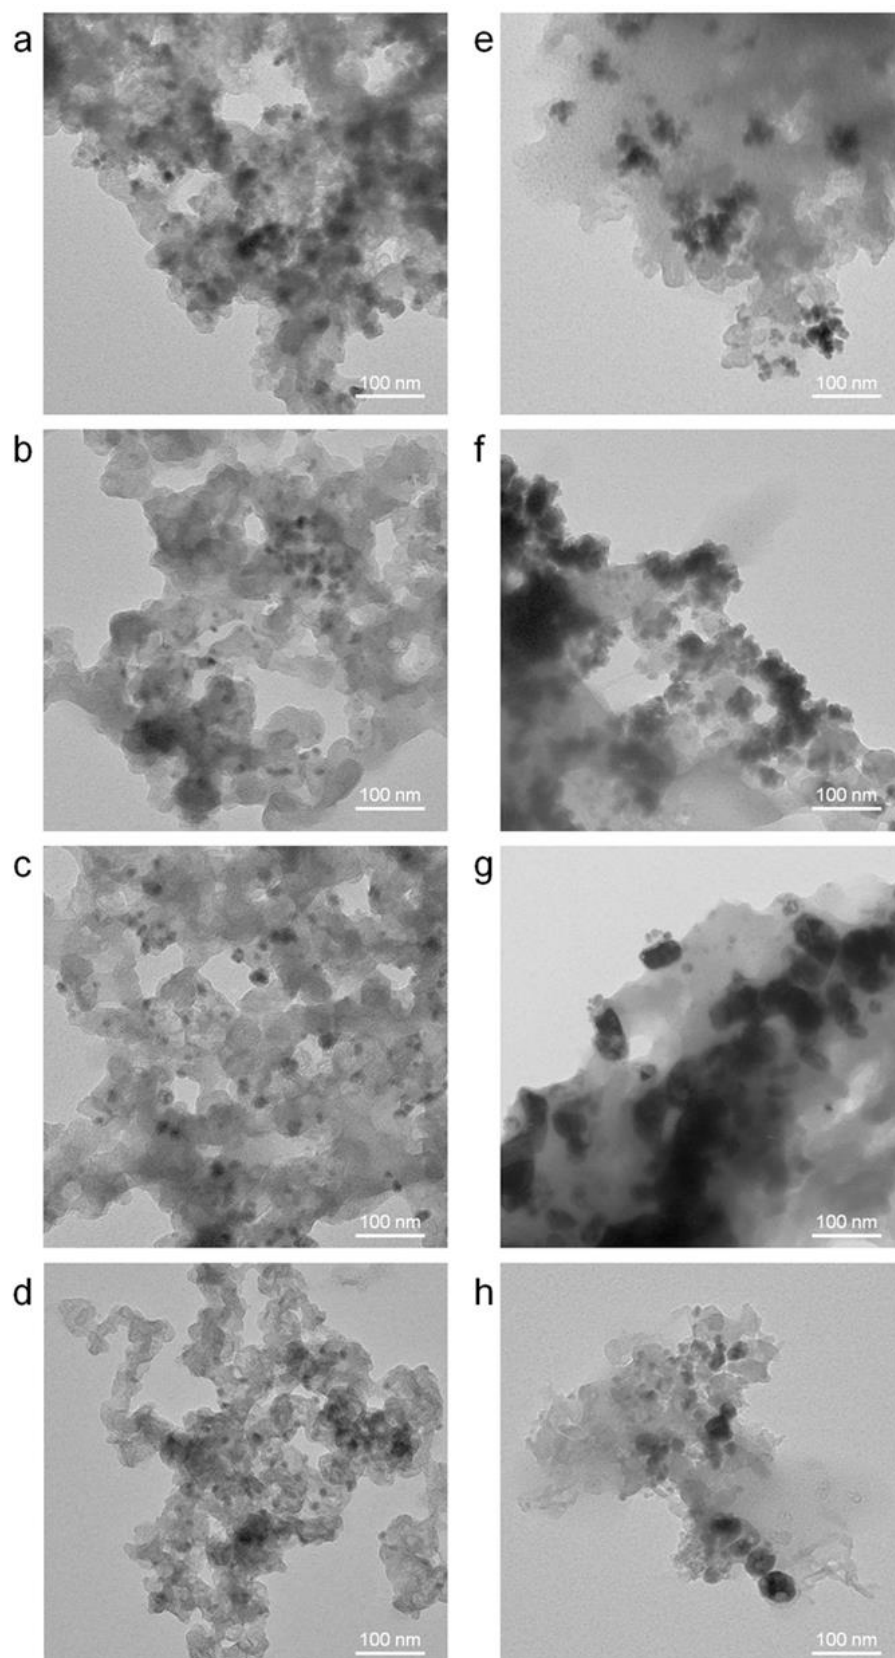

**Supplementary Fig. 33** TEM images of KB@Cu<sub>3</sub>(HHTP)<sub>2</sub> after 0.25 h CO<sub>2</sub>RR at (a)-1.22 V, (b)-1.37 V, (c)-1.49 V and (d)-1.65 V. TEM images of KB@Cu<sub>3</sub>(HHTP)<sub>2</sub> after 0.25 h CO<sub>2</sub>RR at (e)-1.26 V, (f)-1.42 V, (g)-1.51 V and (h)-1.73 V.

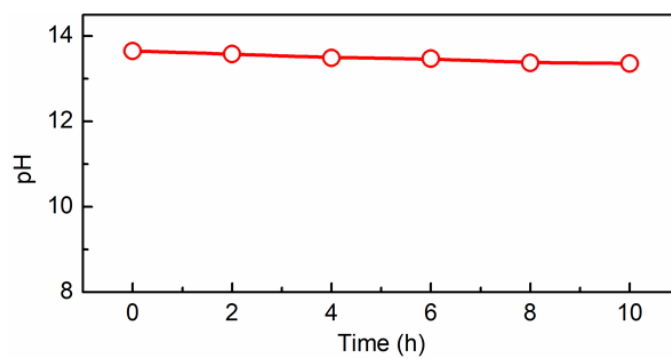

**Supplementary Fig. 34** The pH of the electrolyte (1 M KOH) at different reaction time.

**Supplementary Table 1.** Comparison of CO<sub>2</sub>RR performance for KB@Cu<sub>3</sub>(HITP)<sub>2</sub> and other Cu-based catalysts reported in literature (H-cell).

| catalyst                                              | electrolyte              | potential<br>(V vs. RHE) | C <sub>2</sub> H <sub>4</sub><br>FE (%) | C <sub>2</sub> H <sub>4</sub><br><i>j</i> (mA cm <sup>-2</sup> ) |
|-------------------------------------------------------|--------------------------|--------------------------|-----------------------------------------|------------------------------------------------------------------|
| KB@Cu <sub>3</sub> (HITP) <sub>2</sub><br>(This work) | 0.1 M KHCO <sub>3</sub>  | -1.37                    | ~70                                     | ~26.5                                                            |
|                                                       |                          | -1.67                    | ~64                                     | ~37.4                                                            |
| PcCu-Cu-O <sup>2</sup>                                | 0.1 M KHCO <sub>3</sub>  | -1.2                     | ~50                                     | 7.3                                                              |
| AN-Cu <sup>3</sup>                                    | 0.1 M KHCO <sub>3</sub>  | -1.08                    | ~38.1                                   | ~7.3                                                             |
| Cu <sub>2</sub> O film <sup>4</sup>                   | 0.1 M KHCO <sub>3</sub>  | -0.99                    | ~37.5                                   | ~12.9                                                            |
| Cu-on-Cu <sub>3</sub> N <sup>5</sup>                  | 0.1 M KHCO <sub>3</sub>  | -0.95                    | ~39                                     | ~14 (C <sub>2+</sub> )                                           |
| O <sub>2</sub> -plasma Cu <sup>6</sup>                | 0.1 M KHCO <sub>3</sub>  | -0.9                     | ~60                                     | ~6.6                                                             |
| ERD Cu <sup>7</sup>                                   | 0.1 M KHCO <sub>3</sub>  | -1.2                     | ~38                                     | ~22                                                              |
| Cu nanocube <sup>8</sup>                              | 0.25 M KHCO <sub>3</sub> | -0.96                    | ~32.5                                   | ~21                                                              |
| decahedron Cu <sup>9</sup>                            | 0.1 M KHCO <sub>3</sub>  | -0.993                   | ~52                                     | ~17.6                                                            |
| Cu-mesocrystal <sup>10</sup>                          | 0.1 M KHCO <sub>3</sub>  | -0.99                    | ~27.2                                   | ~6.8                                                             |
| Cu <sub>3</sub> -Ag <sub>3</sub> Au NFs <sup>11</sup> | 0.1 M KHCO <sub>3</sub>  | -1.2                     | ~69                                     | ~13                                                              |
| OBC <sup>12</sup>                                     | 0.5 M KHCO <sub>3</sub>  | -1.00                    | 45                                      | 44.7                                                             |

**Supplementary Table 2.** The average size of Cu nanoparticles calculated using the Debye-Scherrer equation.

|                                        | 0.25 h  | 1 h     | 5 h     | 10 h    |
|----------------------------------------|---------|---------|---------|---------|
| KB@Cu <sub>3</sub> (HITP) <sub>2</sub> | 15.5 nm | 16.0 nm | 17.4 nm | 14.5 nm |
| Cu <sub>3</sub> (HITP) <sub>2</sub>    | 18.7 nm | 23.4 nm | 46.2 nm | 52.3 nm |

Debye-Scherrer formula:  $D = \frac{K \times \gamma}{B \times \cos \theta}$

D: average size (nm)

K: Scherrer constant (0.89)

$\gamma$ : X-ray wavelength (0.154056 nm)

B: FWHM of diffraction peak (rad)

$\theta$ : Bragg diffraction Angle (rad)

**Supplementary Table 3** Free energy change of all PCET steps along C<sub>2</sub> pathway after 2\*CO adsorption on active sites of Cu-RNP and Cu(111). The energy unit is eV.

| PCET             | Reaction                                                     | Active site | $\Delta G$ |
|------------------|--------------------------------------------------------------|-------------|------------|
| 5 <sup>th</sup>  | $*CO+*CO + H^+ + e^- \rightarrow *CO-COH$                    | 1@Cu-RNP    | 0.61       |
|                  |                                                              | 2@Cu-RNP    | 0.68       |
|                  |                                                              | 3@Cu-RNP    | 0.67       |
|                  |                                                              | Cu(111)     | 1.30       |
| 6 <sup>th</sup>  | $*CO-COH + H^+ + e^- \rightarrow *COH-COH$                   | 1@Cu-RNP    | 0.05       |
|                  |                                                              | 2@Cu-RNP    | -0.04      |
|                  |                                                              | 3@Cu-RNP    | -0.13      |
| 7 <sup>th</sup>  | $*COH-COH+H^+ + e^- \rightarrow *C-COH + H_2O$               | 1@Cu-RNP    | -0.15      |
|                  |                                                              | 2@Cu-RNP    | 0.26       |
|                  |                                                              | 3@Cu-RNP    | 0.02       |
| 8 <sup>th</sup>  | $*C-COH+ H_2O + H^+ + e^- \rightarrow *CH-COH+ H_2O$         | 1@Cu-RNP    | -0.48      |
|                  |                                                              | 2@Cu-RNP    | -0.82      |
|                  |                                                              | 3@Cu-RNP    | -0.56      |
| 9 <sup>th</sup>  | $*CH-COH+ H_2O + H^+ + e^- \rightarrow *CH-CHOH+ H_2O$       | 1@Cu-RNP    | -0.63      |
|                  |                                                              | 2@Cu-RNP    | -0.11      |
|                  |                                                              | 3@Cu-RNP    | -0.80      |
| 10 <sup>th</sup> | $*CH-CHOH+ H_2O + H^+ + e^- \rightarrow *CH_2-CHOH+ H_2O$    | 1@Cu-RNP    | -0.32      |
|                  |                                                              | 2@Cu-RNP    | -0.49      |
|                  |                                                              | 3@Cu-RNP    | 0.05       |
| 11 <sup>th</sup> | $*CH_2-CHOH+ H_2O + H^+ + e^- \rightarrow *CH_2-CH + 2H_2O$  | 1@Cu-RNP    | -0.19      |
|                  |                                                              | 2@Cu-RNP    | -0.48      |
|                  |                                                              | 3@Cu-RNP    | -0.06      |
|                  |                                                              | 1@Cu-RNP    | 0.26       |
| 12 <sup>th</sup> | $*CH_2-CHOH+ H_2O + H^+ + e^- \rightarrow *CH_3-CHOH + H_2O$ | 2@Cu-RNP    | 0.23       |
|                  |                                                              | 3@Cu-RNP    | 0.27       |
|                  |                                                              | 1@Cu-RNP    | 0.06       |
|                  |                                                              | 2@Cu-RNP    | 0.15       |
| 12 <sup>th</sup> | $*CH_2-CH+ 2H_2O + H^+ + e^- \rightarrow CH_2-CH_2 + 2H_2O$  | 3@Cu-RNP    | 0.04       |
|                  |                                                              | 1@Cu-RNP    | -0.53      |
|                  |                                                              | 2@Cu-RNP    | -0.70      |
|                  |                                                              | 3@Cu-RNP    | -0.56      |

**Supplementary Table 4.** Free energy change of all PCET steps along C1 pathway after 2\*CO adsorption on active sites of Cu-RNP and Cu(111). The energy unit is eV.

| PCET             | Reaction                                                        | Active site | $\Delta G$ |
|------------------|-----------------------------------------------------------------|-------------|------------|
| 5 <sup>th</sup>  | $*CO + *CO + H^+ + e^- \rightarrow *CO + *CHO$                  | 1@Cu-RNP    | 0.92       |
|                  |                                                                 | 2@Cu-RNP    | 0.85       |
|                  |                                                                 | 3@Cu-RNP    | 0.84       |
|                  |                                                                 | Cu(111)     | 1.09       |
| 6 <sup>th</sup>  | $**CO + *CHO + H^+ + e^- \rightarrow *CO + *CHOH$               | 1@Cu-RNP    | 0.03       |
|                  |                                                                 | 2@Cu-RNP    | 0.12       |
|                  |                                                                 | 3@Cu-RNP    | -0.06      |
| 7 <sup>th</sup>  | $*CO + *CHOH + H^+ + e^- \rightarrow *CO + *CH + H_2O$          | 1@Cu-RNP    | -0.66      |
|                  |                                                                 | 2@Cu-RNP    | -0.70      |
|                  |                                                                 | 3@Cu-RNP    | -0.42      |
| 8 <sup>th</sup>  | $*CO + *CH + H_2O + H^+ + e^- \rightarrow *CO + *CH_2 + H_2O$   | 1@Cu-RNP    | -0.03      |
|                  |                                                                 | 2@Cu-RNP    | 0.06       |
|                  |                                                                 | 3@Cu-RNP    | 0.69       |
| 9 <sup>th</sup>  | $*CO + *CH_2 + H_2O + H^+ + e^- \rightarrow *CO + *CH_3 + H_2O$ | 1@Cu-RNP    | -0.24      |
|                  |                                                                 | 2@Cu-RNP    | -0.82      |
|                  |                                                                 | 3@Cu-RNP    | -0.79      |
| 10 <sup>th</sup> | $*CO + *CH_3 + H_2O + H^+ + e^- \rightarrow *CO + CH_4 + H_2O$  | 1@Cu-RNP    | -1.39      |
|                  |                                                                 | 2@Cu-RNP    | -0.92      |
|                  |                                                                 | 3@Cu-RNP    | -0.49      |

**Supplementary Table 5.** Comparison of CO<sub>2</sub>RR performance for Cu<sub>3</sub>(HITP)<sub>2</sub> and other Cu(111) based catalysts reported in literatures.

| <b>catalyst</b>                                    | <b>active surface</b> | <b>potentials</b> | <b>CH<sub>4</sub> FE</b> | <b>CO FE</b> |
|----------------------------------------------------|-----------------------|-------------------|--------------------------|--------------|
| Cu <sub>oh</sub> <sup>13</sup>                     | Cu (111)              | -0.93 V. vs. RHE  | ~36.1%                   | ~5.8%        |
| Copper Single<br>Crystal Electrodes <sup>14</sup>  | Cu (111)              | -1.52 V vs SHE    | ~50.5%                   | ~4.9%        |
| Cu <sub>3</sub> (HITP) <sub>2</sub><br>(This work) | Cu (111)              | -1.3 V. vs. RHE   | ~28%                     | ~2%          |



**Supplementary Table 6.** Free energy for gas phase species.

|                                      | <b>E (eV)</b> | <b>ZPE (eV)</b> | <b>-TS (eV)</b> | <b>G (eV)</b> |
|--------------------------------------|---------------|-----------------|-----------------|---------------|
| H <sub>2</sub> (g)                   | -6.75         | 0.27            | -0.41           | -6.89         |
| H <sub>2</sub> O (g)                 | -14.22        | 0.56            | -0.67           | -14.33        |
| CO (g)                               | -14.80        | 0.13            | -0.61           | -14.70        |
| CO <sub>2</sub> (g)                  | -23.01        | 0.31            | -0.66           | -23.36        |
| CH <sub>4</sub> (g)                  | -24.01        | 1.19            | -0.57           | -23.39        |
| C <sub>2</sub> H <sub>4</sub> (g)    | -31.97        | 1.37            | -0.55           | -31.15        |
| C <sub>2</sub> H <sub>5</sub> OH (g) | -46.88        | 2.13            | -0.60           | -45.35        |

**Supplementary Table 7.** Electron assigned for the intermediates \*CO, \*CHO and CO<sub>(g)</sub> on Cu(111) under different \*H coverage to simulate targeted bias potentials.

| Intermediates     | Potentials                          | *H coverage (ML) | Electron Assigned ( e ) |
|-------------------|-------------------------------------|------------------|-------------------------|
| *CO               | 0 V vs RHE<br>(-0.39 V. vs. NHE)    | 2/16             | -1.20                   |
|                   |                                     | 4/16             | -1.24                   |
|                   |                                     | 8/16             | -1.37                   |
|                   | -1.3 V vs RHE<br>(-1.69 V. vs. NHE) | 2/16             | -5.24                   |
|                   |                                     | 4/16             | -5.41                   |
|                   |                                     | 8/16             | -5.50                   |
| *CHO              | 0 V vs RHE<br>(-0.39 V. vs. NHE)    | 2/16             | -0.86                   |
|                   |                                     | 4/16             | -0.84                   |
|                   |                                     | 8/16             | -1.18                   |
|                   | -1.3 V vs RHE<br>(-1.69 V. vs. NHE) | 2/16             | -5.10                   |
|                   |                                     | 4/16             | -5.06                   |
|                   |                                     | 8/16             | -5.24                   |
| CO <sub>(g)</sub> | 0 V vs RHE<br>(-0.39 V. vs. NHE)    | 2/16             | -0.85                   |
|                   |                                     | 4/16             | -0.82                   |
|                   |                                     | 8/16             | -0.91                   |
|                   | -1.3 V vs RHE<br>(-1.69 V. vs. NHE) | 2/16             | -4.89                   |
|                   |                                     | 4/16             | -4.98                   |
|                   |                                     | 8/16             | -5.16                   |

## References:

- 1 Chen, L., Tang, C., Jiao, Y. & Qiao, S. Z. Anomalous C-C Coupling on Under-Coordinated Cu (111): A Case Study of Cu Nanopyramids for CO<sub>2</sub> Reduction Reaction by Molecular Modelling. *ChemSusChem* **14**, 671-678, (2021).
- 2 Qiu, X. F., Zhu, H. L., Huang, J. R., Liao, P. Q. & Chen, X. M. Highly Selective CO<sub>2</sub> Electroreduction to C<sub>2</sub>H<sub>4</sub> Using a Metal-Organic Framework with Dual Active Sites. *J. Am. Chem. Soc.* **143**, 7242-7246, (2021).
- 3 Lee, S. Y. *et al.* Mixed Copper States in Anodized Cu Electrocatalyst for Stable and Selective Ethylene Production from CO<sub>2</sub> Reduction. *J. Am. Chem. Soc.* **140**, 8681-8689, (2018).
- 4 Ren, D. *et al.* Selective Electrochemical Reduction of Carbon Dioxide to Ethylene and Ethanol on Copper(I) Oxide Catalysts. *ACS Catal.* **5**, 2814-2821, (2015).
- 5 Liang, Z. Q. *et al.* Copper-on-nitride enhances the stable electrosynthesis of multi-carbon products from CO<sub>2</sub>. *Nat. Commun.* **9**, 3828, (2018).
- 6 Mistry, H. *et al.* Highly selective plasma-activated copper catalysts for carbon dioxide reduction to ethylene. *Nat. Commun.* **7**, 12123, (2016).
- 7 De Luna, P. *et al.* Catalyst electro-redeposition controls morphology and oxidation state for selective carbon dioxide reduction. *Nat. Catal.* **1**, 103-110, (2018).
- 8 Jiang, K. *et al.* Metal ion cycling of Cu foil for selective C-C coupling in electrochemical CO<sub>2</sub> reduction. *Nat. Catal.* **1**, 111-119, (2018).
- 9 Choi, C. *et al.* A Highly Active Star Decahedron Cu Nanocatalyst for Hydrocarbon Production at Low Overpotentials. *Adv. Mater.* **31**, e1805405, (2019).
- 10 Chen, C. S. *et al.* Stable and selective electrochemical reduction of carbon dioxide to ethylene on copper mesocrystals. *Catalysis Science & Technology* **5**, 161-168, (2015).
- 11 Xiong, L. *et al.* Breaking the Linear Scaling Relationship by Compositional and Structural Crafting of Ternary Cu-Au/Ag Nanoframes for Electrocatalytic Ethylene Production. *Angew. Chem. Int. Ed.* **60**, 2508-2518, (2021).
- 12 Zhang, W. *et al.* Atypical Oxygen-Bearing Copper Boosts Ethylene Selectivity toward Electrocatalytic CO<sub>2</sub> Reduction. *J. Am. Chem. Soc.* **142**, 11417-11427, (2020).
- 13 De Gregorio, G. L. *et al.* Facet-Dependent Selectivity of Cu Catalysts in Electrochemical CO<sub>2</sub> Reduction at Commercially Viable Current Densities. *ACS Catal.* **10**, 4854-4862, (2020).
- 14 Hori, Y., Takahashi, I., Koga, O. & Hoshi, N. Selective formation of C<sub>2</sub> compounds from electrochemical reduction of CO<sub>2</sub> at a series of copper single crystal electrodes. *J. Phys. Chem. B* **106**, 15-17, (2002).
